# Supplementary material for: Synthesis of single-crystalline, porous TaON microspheres toward visible-light photocatalytic conversion of CO2 into liquid hydrocarbon fuels
Source: Royal Society of Chemistry journal article supplement (doi:10.1039/c6ra19368d), 2016-01-01
Supplement: c6ra19368d1.pdf [file c6ra19368d1.pdf]

## Supporting Information

### **Synthesis of single-crystalline, porous TaON microspheres toward visible-light photocatalytic conversion of CO<sub>2</sub> into liquid hydrocarbon fuels**

Qiutong Han,<sup>a, b, c, d</sup> Yong Zhou,<sup>\*, a, b, c, d</sup> Lanqin Tang,<sup>a, b, c, d, e</sup> Ping Li,<sup>a, b, c, d</sup> Wenguang Tu,<sup>a, b, c, d</sup> Liang Li,<sup>a, b, c, d</sup> Haijin Li,<sup>a, b, c, d</sup> and Zhigang Zou<sup>\*, a, b, c</sup>

<sup>a</sup>*Jiangsu Key Laboratory for Nano Technology, Nanjing University, Nanjing 210093, P. R. China. E-mail: zhoyong1999@nju.edu.cn*

<sup>b</sup>*Key Laboratory of Modern Acoustics, MOE, Institute of Acoustics, Department of Physics, Nanjing University, Nanjing 210093, P. R. China. E-mail: zgzou@nju.edu.cn*

<sup>c</sup>*National Laboratory of Solid State Microstructures, Department of Physics, and Collaborative Innovation Center of Advanced Microstructures, Nanjing University, Nanjing 210093, P.R. China*

<sup>d</sup>*Eco-materials and Renewable Energy Research Center (ERERC), Nanjing University, Nanjing 210093, P. R. China*

<sup>e</sup>*College of Chemistry and Chemical Engineering, Yangcheng Institute of Technology, Yancheng 22401, P. R. China*

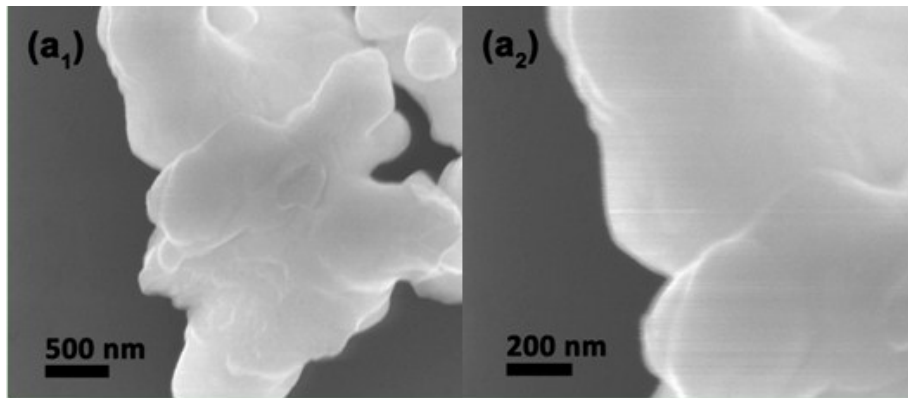

**Figure S1.** Different magnification FE-SEM images of the commercial Ta<sub>2</sub>O<sub>5</sub>.
